# Supplementary material
Source: PubMed Central journal article supplement (PMC3198787)

**A**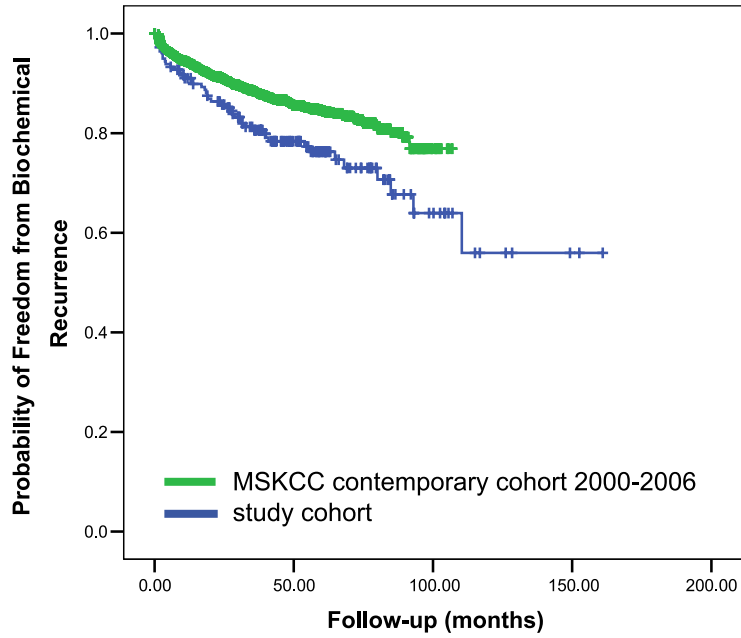**B**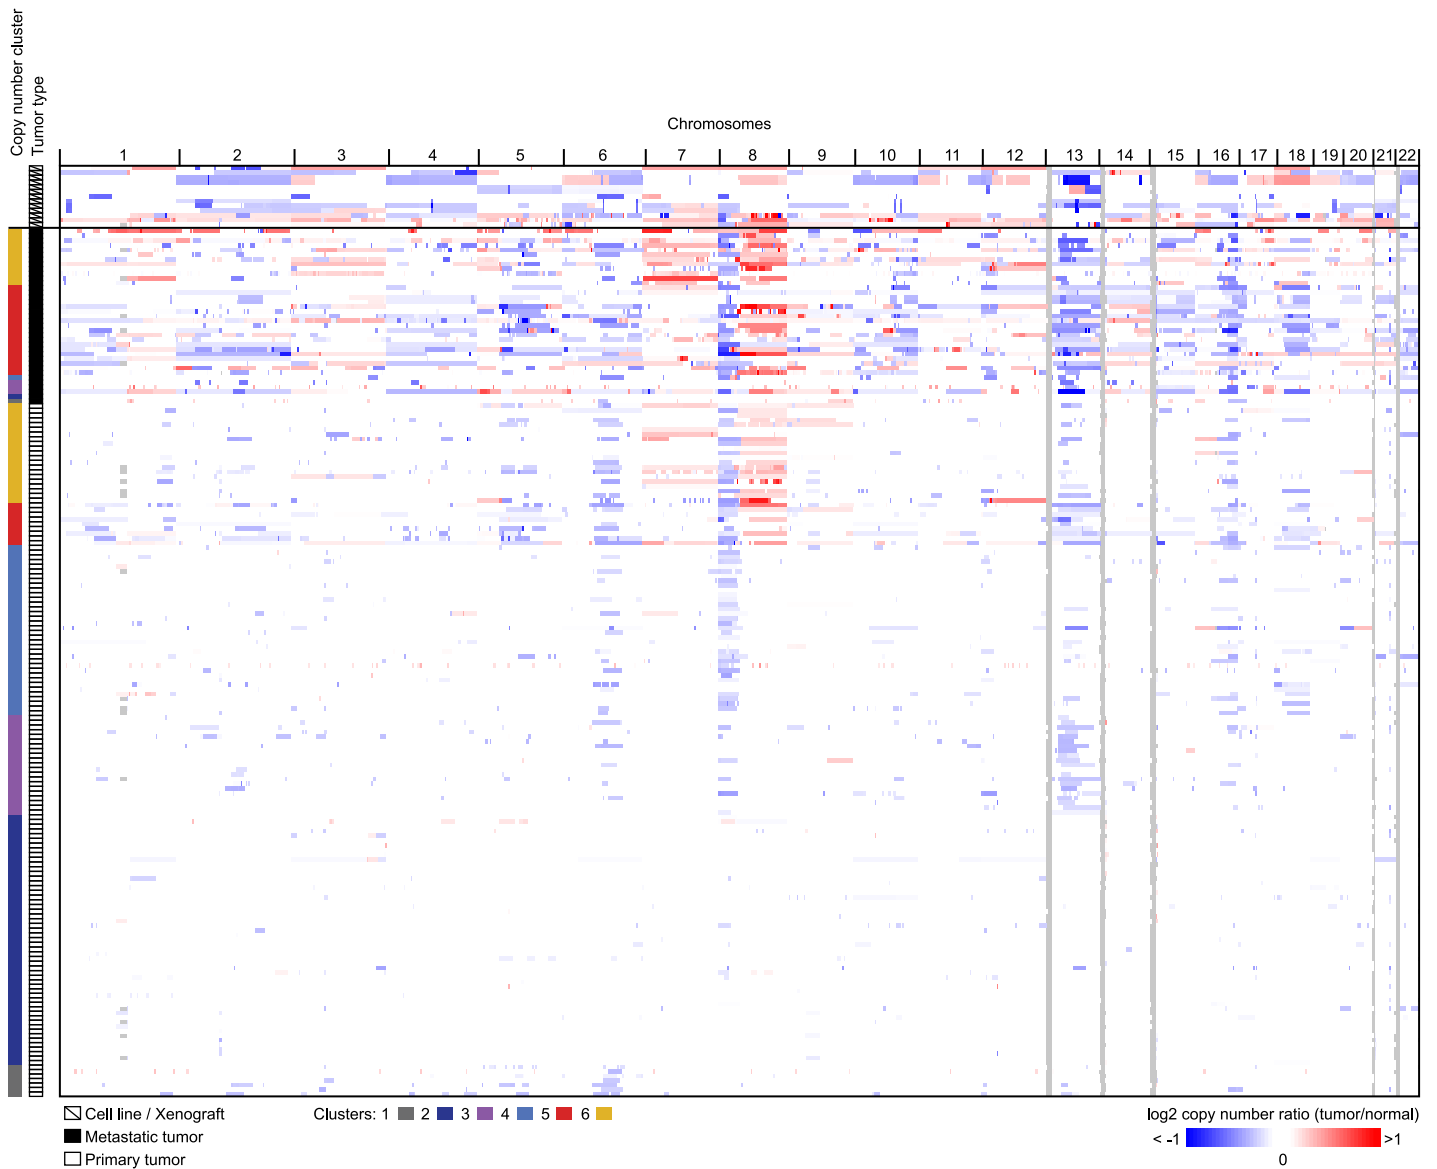

Supplement: NIHMS271566-supplement-02.pdf [file NIHMS271566-supplement-02.pdf]

**A**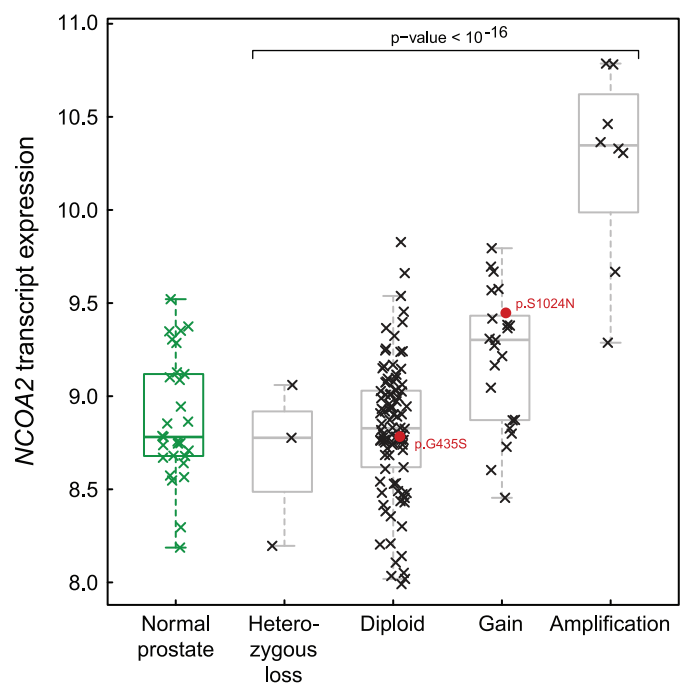**B**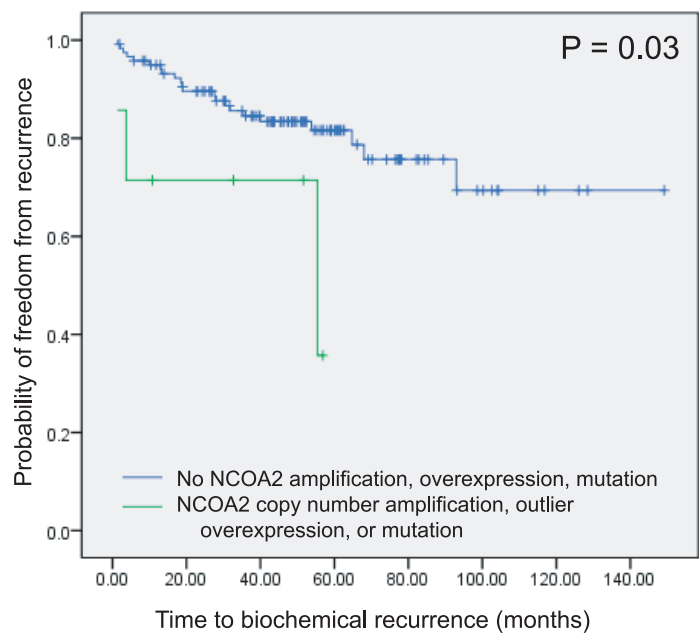

Supplement: NIHMS271566-supplement-03.pdf [file NIHMS271566-supplement-03.pdf]

**A** mRNA

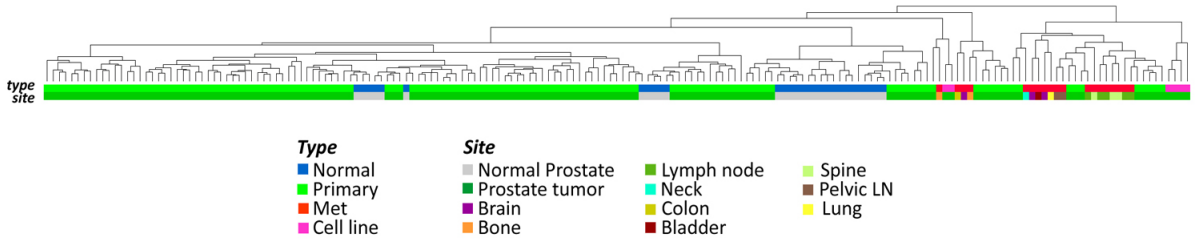

miRNA

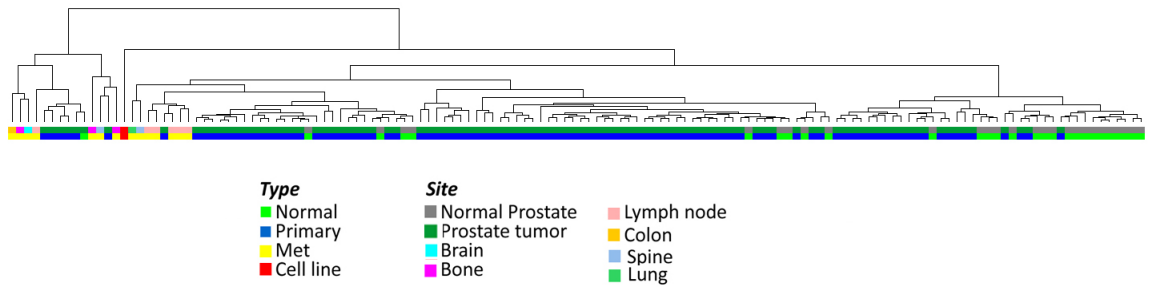

**B**

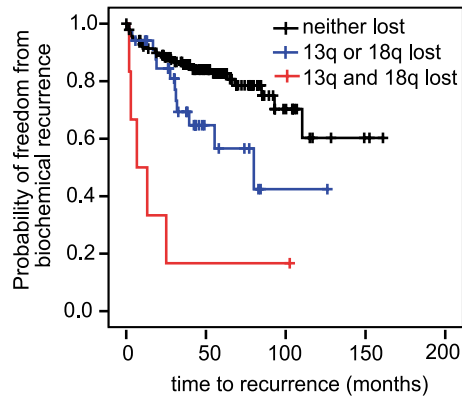

**C**

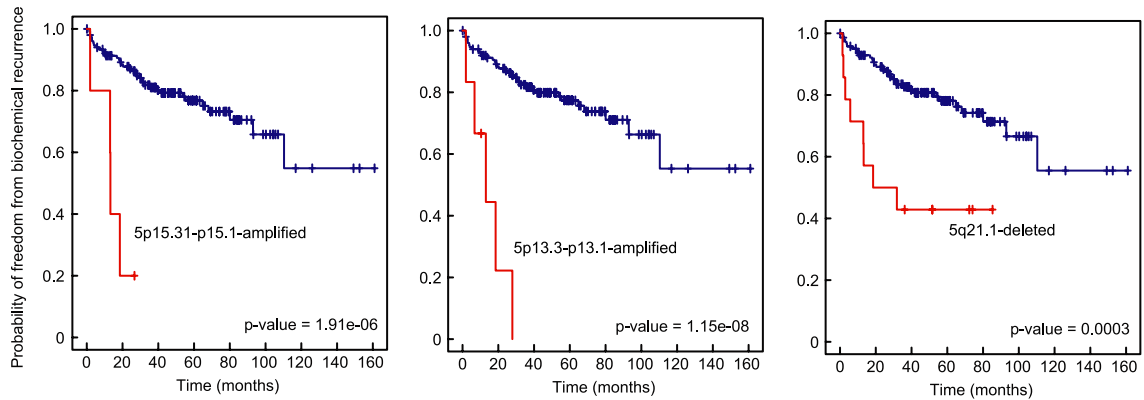

Supplement: NIHMS271566-supplement-04.pdf [file NIHMS271566-supplement-04.pdf]
